# Supplementary material for: Rnf152 Is Essential for NeuroD Expression and Delta-Notch Signaling in the Zebrafish Embryos
Source: PubMed Central journal article supplement — Mol Cells. 2017 Dec 22;40(12):945–53. doi: 10.14348/molcells.2017.0216 (PMC5750713; doi:10.14348/molcells.2017.0216), 2017-12-22
Supplement: molce-40-12-945s1.pdf [file molce-40-12-945s1.pdf]

### Supplementary fig.-1. Rnf152 protein

**structure analysis through Uniprot.** Zebrafish Rnf152 has 56% similarity with RNF152 from human, chimpanzee, mouse, *Xenopus*, and chicken. Analysis of amino acid sequence show that it has a RING-domain at the N-terminus and a transmembrane domain at the C-terminus. The red box indicates the RING-domain and green box denotes the transmembrane domain of Rnf152. Zebrafish Rnf152 is composed of 198 amino acids while homologues from the higher vertebrate are of 203 amino acids.

|            |     |                                                               |     |
|------------|-----|---------------------------------------------------------------|-----|
| Human      | 1   | METLSQDSLLE                                                   | 60  |
| chimpanzee | 1   | METLSQDSLLE                                                   | 60  |
| Mouse      | 1   | METLSQDSLLE                                                   | 60  |
| Chicken    | 1   | METLSQDSLLE                                                   | 60  |
| Xenopus    | 1   | METLSQDSLLE                                                   | 60  |
| Zebrafish  | 1   | MDSLSQSSRL                                                    | 60  |
|            |     | *****                                                         |     |
| Human      | 61  | PPGFSVSQLPDDPEVLAVIAIPHTSEHTPVFIKLP                           | 120 |
| chimpanzee | 61  | PPGFSVSQLPDDPEVLAVIAIPHTSEHTPVFIKLP                           | 120 |
| Mouse      | 61  | PPGFSVSQLPDDPEVLAVIAIPHTSEHTPVFIKLP                           | 120 |
| Chicken    | 61  | PPGYSVSQLPDDPEVIAVIAIPHTSEHTPVFIKLP                           | 120 |
| Xenopus    | 61  | PPGYSVSQLPDDPDVVAVIAIPHTSEHTPVFIKLP                           | 120 |
| Zebrafish  | 61  | PIGLSVSHLPDDPEVLSVISVSQSEHTPIFIHLP                            | 120 |
|            |     | *****                                                         |     |
| Human      | 121 | LLPGSQQKSVTVVTIPAEQOPLQGGAPQEAVEEEQDRRGVVKSSSTWSGVCTVILVACVLV | 180 |
| chimpanzee | 121 | LLPGSQQKSVTVVTIPAEQOPLQGGAPQEAVEEEQDRRGVVKSSSTWSGVCTVILVACVLV | 180 |
| Mouse      | 121 | LLPGSQQKSLTVVTIPAEQOPLQGGAPQEAVEEPPDRRGVVKSSSTWSGVCTVILVACVLV | 180 |
| Chicken    | 121 | LLPGSQQKSLAVVTIPAEQOPLQGGAPAEAGAEPPDRRGVVKSSSTWSGVCTVILVACVLV | 180 |
| Xenopus    | 121 | LLPGNQQKPVTVVTMPMEQHPHGNISQDIVEEEHERRGVVKSSSTWSGVCTVILVACVLV  | 180 |
| Zebrafish  | 121 | VGPKSI----GVFDVSDGQNHVLGHDGL-GDGMEEEVVVKTTAWGVCTVLLVAFILI     | 175 |
|            |     | *****                                                         |     |
| Human      | 181 | FLLGIVLHNMSCISKRFTVISC                                        | 203 |
| chimpanzee | 181 | FLLGIVLHNMSCISKRFTVISC                                        | 203 |
| Mouse      | 181 | FLLGIVLHNMSCISKRFTVISC                                        | 203 |
| Chicken    | 181 | FLLGIVLHNMSCISKRFTVISC                                        | 203 |
| Xenopus    | 181 | FLLGIVLHNMSCISKRFTVISC                                        | 203 |
| Zebrafish  | 176 | FLLGIVLHNMSCVSKRFTIISC                                        | 198 |
|            |     | *****                                                         |     |

-RING-domain

-Transmembrane domain

**Supplementary fig. 2. Level of *deltaC* transcripts is elevated in *rnf152* morphants.** *rnf152* MO were analyzed with WISH using *deltaC* as a probe. (A&D) WT embryos, (B&E) embryos injected with 5' mismatch as control, and (C&F) embryos injected with *rnf152* MO. *deltaC* transcripts were abundant in the ONL and INL of the eyes, but low in the forebrain, midbrain, and hindbrain of WT (A&D) and 5' mismatch (B&E). However Level of *deltaC* transcripts was significantly elevated in the ONL, INL, and GCL of the eye (C&F). Red arrows indicate the layers of eyes where level of *deltaC* transcripts were elevated at 24 hpf (n=3). Scale bars A-F: 50  $\mu$ m.

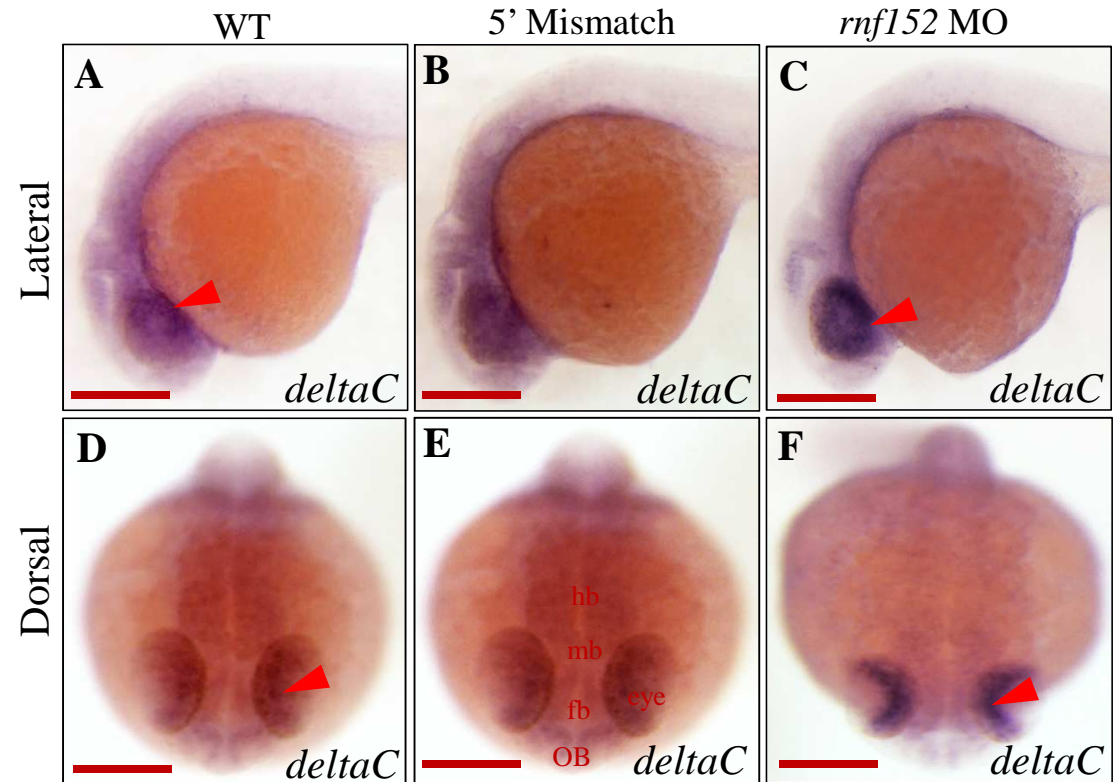

**Supplementary fig. 3. Transcripts of *notch1b* is not effected by *rnf152* knock-down.** WISH analysis with *notch1b* transcripts in *rnf152* MO. (A&D) WT embryos, (B&E) Embryos injected with 5' mismatch MO control, and (C&F) Embryos injected with *rnf152* MO. Level of *notch1b* transcripts was similar among the three groups. Dotted red circles indicate eyes. Red arrowheads indicate eyes, midbrain and hindbrain at 24 hpf (n=3). Scale bars A-F: 50  $\mu$ m.

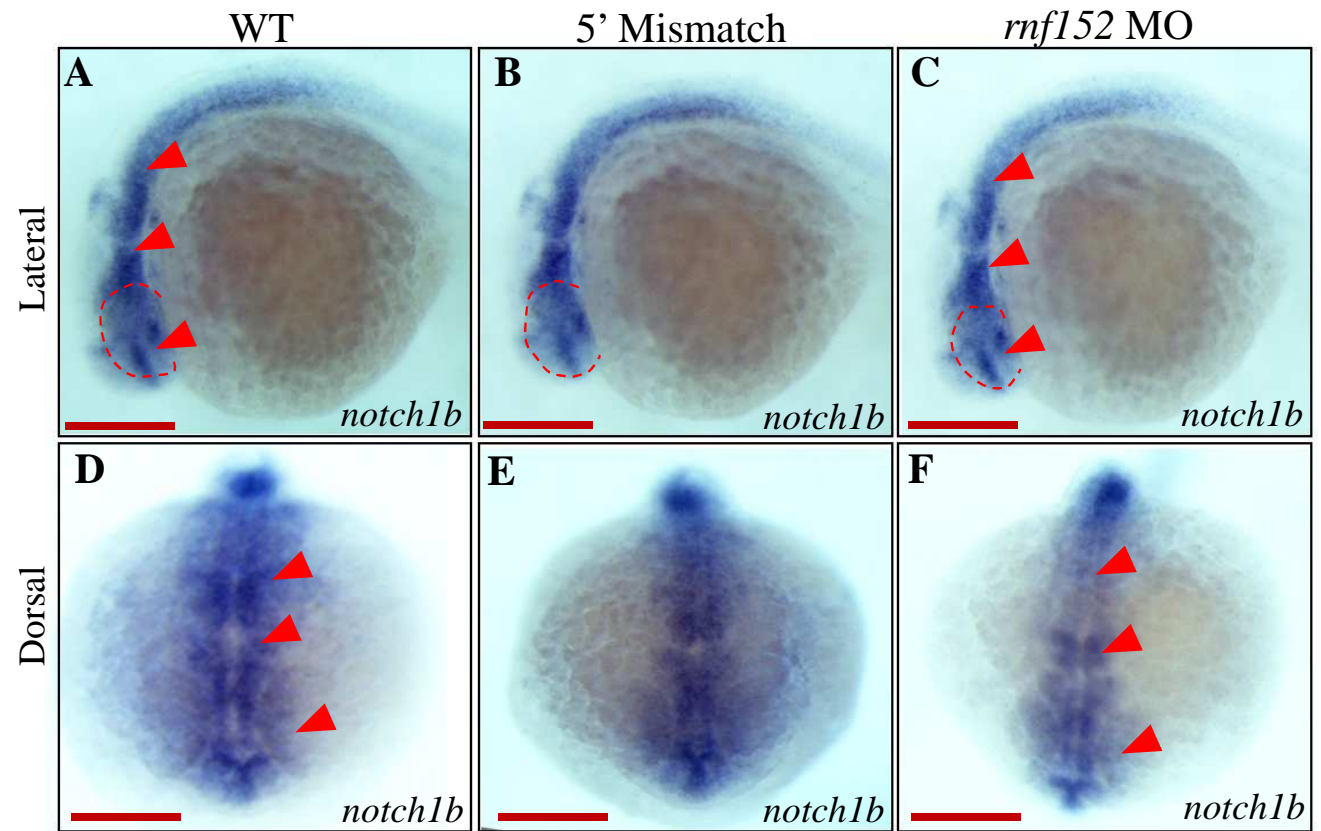

**Supplementary fig. 4. WISH analysis of WT and *rnf152* MO with *rx2*-specific probe identified alterations in the optic vesicles at 12, 15, and 18 hpf. (A-C) 12 hpf, (D-F) 15 hpf, and (G-I) 18 hpf. (A,D,&G) WT embryos, (B,E,&H) Embryos injected with 5' mismatch control morpholino, and (C,F,&I) Embryos injected with *rnf152* morpholino. Level of *rx2* transcripts did not show significant differences in the optic vesicles among WT, 5' mismatch control, and *rnf152* MO at 12, 15, and 18 hpf. Red arrowheads indicate optic vesicle of the embryo (n=3). Scale bars A-I: 50  $\mu$ m.**

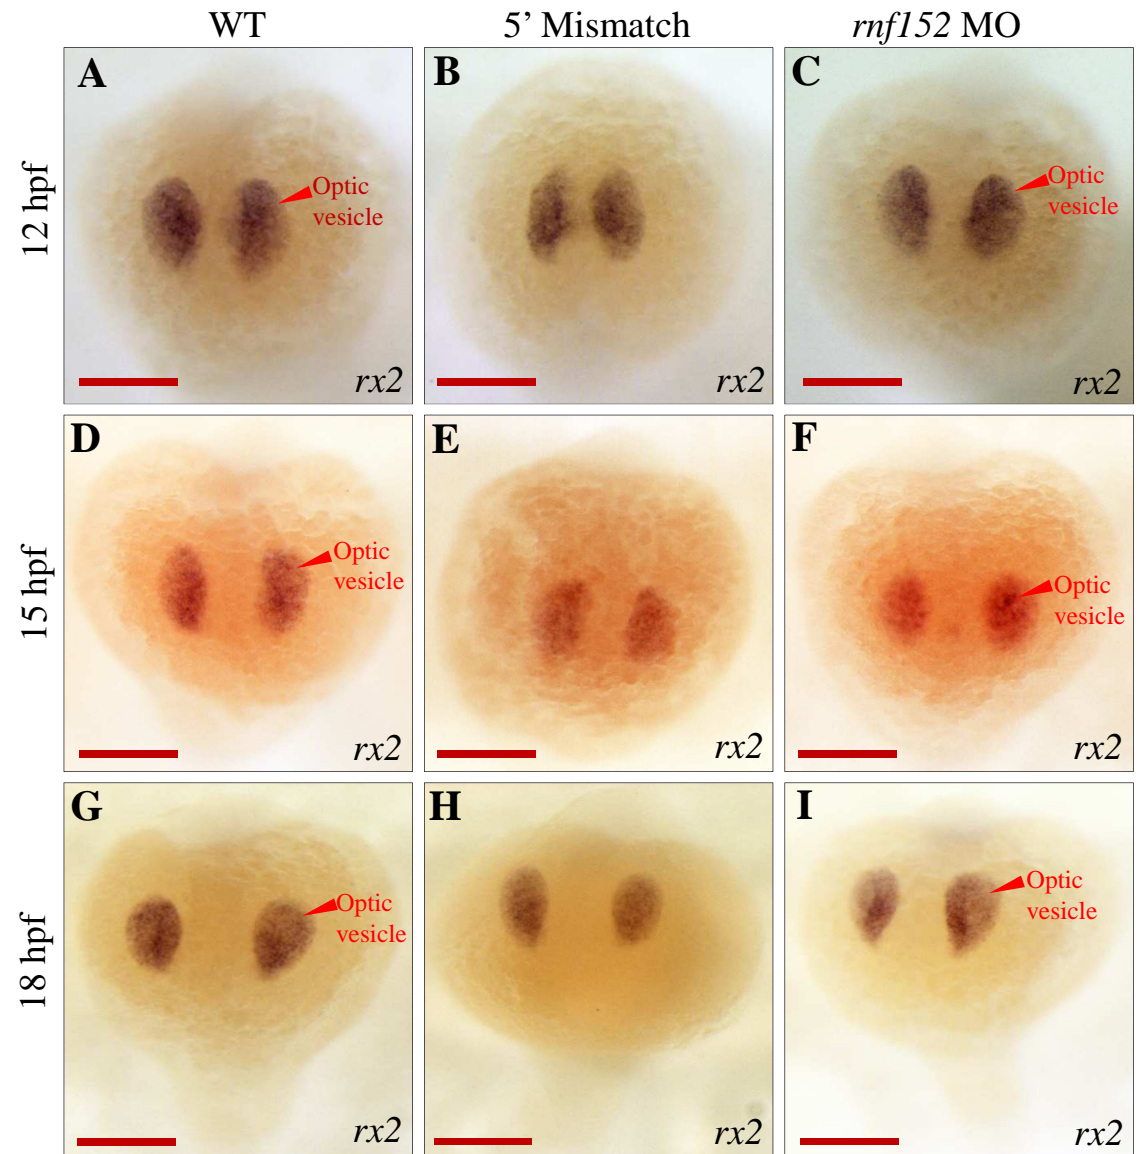

**Supplementary table-1. Statistical analysis and its graph plot for *rnf152* morpholino injected zebrafish embryos.** Synchronized zebrafish embryos were obtained with natural breeding from animal facility. Microinjection was performed with *rnf152* MO (5 ng) and its 5' mismatch MO as a control in equal concentration with distilled water in 1- or 2-cell stage of embryos. All the embryos were observed manually in their particular stages and it was collected at 24 hpf to perform further study (n=3).

| Properties              | Wild type<br>(Uninjected) | 5' Mismatch | <i>rnf152</i> MO (5ng) |
|-------------------------|---------------------------|-------------|------------------------|
| No. of embryos injected | 30                        | 24          | 42                     |
| No. of embryos died     | 0                         | 4           | 7                      |
| Deformed embryos        | 1                         | 3           | 28                     |
| Shrunken Front brain    | 0                         | 0           | 1                      |
| Shrunken Hind brain     | 0                         | 0           | 28                     |
| Smaller eyes            | 0                         | 0           | 24                     |
| Bended Head region      | 0                         | 0           | 0                      |
| Posterior region        | 0                         | 0           | 0                      |

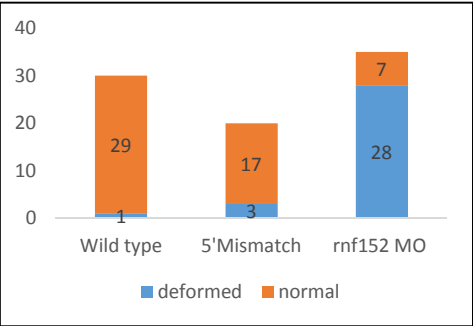

| Fish type              | Deformed | Normal |
|------------------------|----------|--------|
| Wild type              | 1        | 29     |
| 5' Mismatch            | 3        | 17     |
| <i>rnf152</i> MO (5ng) | 28       | 7      |
